# Supplementary material
Source: publisher site journal article supplement (http://static.cambridge.org/content/id/urn:cambridge.org:id:article:S1049023X19004874/resource/name/S1049023X19004874supp001.docx)
Supplement: Supplementary file 1 [file S1049023X19004874supp001.docx]

| **No** | **Author** | **Journal** | **Study Design** | **Method** | **Disaster** | **Location** | **Time frame** | **study pop** | **Total no** | **R/R** | **Male** | **Female** | **Outcomes studied** |
| --- | --- | --- | --- | --- | --- | --- | --- | --- | --- | --- | --- | --- | --- |
|  |  |  |  |  | **Natural Disasters** |  |  |  |  |  | **%** | **%** |  |
|  |  |  |  |  | **Public health Disasters** |  |  |  |  |  |  |  |  |
| 1 | Mian-Yoon Chong et all | British Jr Of psychiatry ,2004 | cross sectional | Self reporting | 2003 SARS Outbreak | Taiwan | During the out break | Doctors, Nurses  ,Admin Staff | 2500 |  | 19 | 81 | Depression, Post traumatic distress, somatic ,Anxiety, Sleep disorder |
| 2 | Rober G Maunder et al | Emerging infectious diseases,2006 | cross sectional | Self reporting | 2003 SARS Outbreak | Canada | 13-26months | Doctors, Nurses, | 1984 | 39 | 14 | 86 | Post traumatic distress, Alcohol abuse, PTSS, Burnout |
| 3 | Lesli A.Nickell et all | Canad Med Ass Jr, 2004 | cross sectional | Self reporting | 2003 SARS Outbreak | Canada | less than 1 month | Doctors, Nurses,  Allied health persons | 4283 | 47 |  |  | Post traumatic distress |
| 4 | Siew E Chua et all | Canad Jr of Psychiatry, 2004 | cross sectional | Self reporting | 2003 SARS Outbreak | Hong Kong | 1 month | Doctors, Nurses, | 766 | 80 |  |  | PTSS |
| 5-A | Grainne M McAlanan | Canad Jr of Psychiatry, 2007 | cross sectional | Self reporting | 2003 SARS Outbreak | Hong Kong | less than 1 month | Doctors, Nurses, | 266 | 79 |  |  | PTSS |
| 5-B | Grainne M McAlanan | Canad Jr of Psychiatry, 2007 | cross sectional | Self reporting | 2003 SARS Outbreak | Hong Kong | 12 month | Doctors, Nurses, | 280 | 66 |  |  | Depression, Anxiety, PTSS |
| 6 | YaMei Bai et al | Psychiatric services,2004 | cross sectional | Self reporting | 2003 SARS Outbreak | Taiwan | less than 1 month | Doctors,  Nurses,  Admin Staff | 557 | 61 |  |  | Post traumatic distress,  Anxiety,  Sleep disorder |
| 7 | Angelina O.M et al | Occupational medicine,2004 | cross sectional | Self reporting | 2003 SARS Outbreak | Singapore | after 2months | Doctors,  Nurses | 993 | 67 |  |  | PTSD, |
| 8 | E Poon et all | Hong Kong Med J. 2004 | cross sectional | Self reporting | 2003 SARS Outbreak | Hong Kong | within 1 month | Doctors,  Nurses,  Allied health persons,  Admin Staff | 4252 | 48 |  |  | Anxiety |
| 9 | Tai W. Wong et al | Europ J of Emerg Med,2005 | cross sectional | Self reporting | 2003 SARS Outbreak | Hong Kong | within 1 month | Doctors,  Nurses,  Allied health persons | 1260 | 37 | 34 | 66 | Post traumatic distress |
| 10 | William J Lancee | Psychiatric serv,2010 | cross sectional | clinical interview | 2003 SARS Outbreak | Canada | 13-22months | Nurses | 587 | 24 | 13 | 87 | PTSD,  Depression,  Anxiety,  Alcohol abuse |
| 11 | KY Tham et al | Hong Kong Jr of Em Med,2005 | cross sectional | Self reporting | 2003 SARS Outbreak | Singapore | 6 months | Doctors, Nurses | 124 | 77.4 | 31 | 69 | Depression,  somatic ,Anxiety,  Sleep disorder,  PTSS |
| 12 | C-Y Lin et al | emjonline,2006 | cross sectional | clinical interview | 2003 SARS Outbreak | Taiwan | 1-3months after | Doctors, Nurses | 92 | 90.2 | 8.7 | 91 | PTSD, somatic |
| 13 | Cheng-Sheng Chen | Psychiatric Services ,2005 | cross sectional ,case control | Self reporting | 2003 SARS Outbreak | Taiwan | less than 1 month | Nurses | 184 | 69.5 | 0 | 100 | Depression, somatic ,A Anxiety, PTSS |
| 14 | Panagiota Goulia et al | BMC infectious disease | cross sectional | Self reporting | 2009 A/H1N1 Pandemic | Greece | 2months | Doctors, Nurses, Allied health persons, |  | 46.9 | 31 | 68 | Post traumatic distress |
| 15 | Mohammed Al Ghoban et al | Emerg Med International 2017 | cross sectional | Self reporting | 2015 MERS outbreak | Saudi Arabia |  | Doctors | 137 | 69 | 65 | 35 | PTSD0 |
| 16 | Atushi Sakuma et al | BMC Psychiatry,2015 | cross sectional | Self reporting | 2011 Japan Earthquake | Japan | 14months | Doctors,  Nurses,  Allied health persons,  Fire fighters | 1561 | 82.9 |  |  | PTSD  ,Depression  ,Post traumatic distress  Anxiety |
| 17 | Erol Armagan et al | Prehospital & Disaster Medicine ,2006 | cross sectional | clinical interview | 2004 Asia Tsunami | Turkey | after 1 month | Doctors, Nurses | 36 | 92 | 51 | 49 | PTSD, |
| 18 | Peng Kang et al | Psychiatry Research 2015 | cross sectional | clinical interview | 2010 Yushu earthquqke | China | 8 months | Doctors, Nurses | 338 | 88.7 | 34 | 66 | PTSD |
| 19 | Elizabeth D.Battles et all | J.Emergency Nursing 2007 | cross sectional | Self reporting | 2005 Hurricane Katrina | USA |  | Nurses | 21 | 23.8 | 80 | 20 | PTSD |
| 20 | Peter G van der Velden et al | Drug Alcohol Depend,2008 | longitudinal | Self reporting | 2000 Enschede Fireworks Disaster | Netherlands | 18months | EMS,  Paramedic,  Ambulance personnel | 78 | 84% | 79 | 21 | PTSS |
| 21 | Monica Misra et al | Ocupational Medicine, 2009 | cross sectional | Self reporting | 2005 London Bombing | London | 2months | EMS,  Paramedic,  Ambulance personnel | 1050 | 32 | 64 | 36 | PTSD,  Post traumatic distress |
| 22 | Laila Skogstad et al | Scand J Trauma,Resus & Emer Med 2015 | cross sectional | Self reporting | Twin terror attack 2011- Norway | Norway | 8-11months | EMS,  Paramedic,  Ambulance personnel,  Fire fighters, Police | 1276 | 67.3 | 72 | 28 | PTSD,PTSS,PTSD |
| 23 | Bashir Al Najjar | Procedia Social and behavioural sciences,2013 | cross sectional | Self reporting | 2012 Israel- Gazza War | Palestine | 12 months | EMS,  Paramedic,  Ambulance personnel | 1500 | 75.53 | 50 | 50 | PTSD |
| 24 | Nasser Ibrahim Abu Noor et al | Archives of Psychiatric Nursing 2016 | cross sectional | Self reporting | 2014 Gazza War | Palestine |  | Doctors  ,Nurses | 473 | 68.5 | 88 | 12 | PTSD |
| 25 | Gad Lubin et al | Military Medicine ,2007 | cross sectional | From registry | 23 violent incidents 2000-2003, Judea Samaria | Israel |  | Doctors | 160 |  |  |  | PTSD  ,Post traumatic distress |
| 26 | Megan A. Perrin et al | Am. J. Psychiatry, 2007 | cross sectional | Telephonic interview | World trade center disaster | USA | 24-36months | EMS, Paramedic,  Ambulance personnel,  Medical disaster personnel,  Fire fighters,  Police | 1741 |  |  |  | PTSD |
| 27 | Mayris P Webber et al | Am J Ind Med ,2012 | cross sectional | From registry | World trade center disaster | USA | 84-108 months | EMS, Paramedic, Ambulance personnel,  Fire fighters | 10,943 | N/A |  |  | PTSD,  Depression |
| 28 | Jennifer Yip et al | Occup Environ Med 2015 | cross sectional | From registry | World trade center disaster | USA | 144 months | EMS,Paramedic,Ambulance personnel | 2973 | N/A | 78 | 22 | PTSD,  Depression,  Alcohol abuse |

**Table 4.** Showing Details of Studies Included for the Review
